# Supplementary material
Source: publisher site journal article supplement (https://www.dovepress.com/article/585827)
Supplement: Supplementary file 1 [file 585827%20Supplementary%20Material.docx]

**Supplementary material**

Table 1 Supportive Intervention Program for Unmet Needs of Spouses Caregiving Breast Cancer Patients.

| Theme | Intervention Measures |  |
| --- | --- | --- |
| Course 1:  Comprehensive Analysis of Disease Information | 1.1 Health Information Education and Needs-Based Instruction | 1.1.1 Personalized Health Education:  ① The BC disease course is divided into three stages: “Diagnosis Phase,” “Treatment Phase,” and “Recovery Phase.” Researchers provide health education tailored to the patient's current stage and existing knowledge needs. The “Meeting Needs, Walking with Love” intervention manual covers: - Diagnosis Phase: Definition, causes, clinical symptoms, screening, and diagnosis of BC - Treatment Phase: Surgical treatment, chemotherapy/radiotherapy care, and precautions for PICC/PORT catheter maintenance - Recovery Phase: Functional exercises for affected limbs, lymphedema prevention, and regular follow-ups. Guides patients and spouse caregivers to understand and manage BC effectively.  ② Building upon the intervention manual, personalized content is added. The depth and breadth of educational material are adjusted based on the specific circumstances of patients and their spousal caregivers, including age and educational background. Specifically, for younger patients, emphasis is placed on knowledge related to fertility and genetics; for elderly patients, focus is given to the relationship between chronic disease management and BC. |
|  |  | 1.1.2 Multi-Channel Health Information Delivery:  ① Utilize WeChat Official Accounts to disseminate breast cancer-related knowledge. Employ video or graphic formats to educate BC couples on breast cancer treatment and precautions, enhancing information delivery effectiveness and improving their comprehension. This approach reduces misunderstandings and concerns about unfamiliar treatments, bolstering their confidence and motivation to jointly manage the disease as part of the care team. |
|  | 1.2 Interpretation of Test Results and Doctor-Patient Communication | 1.2.1 Test Item Explanation:  ① Organize common test items and their results, proactively addressing frequently asked questions during explanations. Clarify normal ranges for different test results and potential implications of abnormal findings to resolve doubts. |
|  |  | 1.2.2 Enhancing Doctor-Patient Communication:  ① Based on the patient's auxiliary examination results and clinical presentation, the physician explains the purpose and significance of each test. Using easily understandable methods, they describe the clinical condition reflected in the test results to the BC couple. Such communication helps reduce anxiety for the patients and their spousal caregivers, promoting their understanding and trust in the treatment process. |
| Course 2:  Pathways to Physiological Healing | 2.1 Identification and Management of Treatment Side Effects | 2.1.1 Adverse Effect Education:  ① Provide systematic instruction on common complications of anticancer therapy, including nausea, vomiting, hair loss, fatigue, and compromised immunity. Offer corresponding prevention and management strategies such as dietary adjustments, physical therapy, and psychological counseling to ensure patients and their spousal caregivers master effective self-management techniques.  ② Detailed guidance on daily care practices like skin and oral hygiene to prevent and alleviate treatment-related issues such as dry skin and mouth sores.  ③ Encouraging patients and caregivers to provide regular feedback on self-management outcomes. The research team will analyze reasons for any unmastered aspects based on this feedback and offer ongoing guidance and support. |
|  |  | 2.1.2 Medication Usage Guidelines:  ① Inform patients that they must strictly adhere to medical instructions when using all medications. For example: The efficacy of chemotherapy drugs is related to human circadian rhythms. Appropriate timing and dosing of medications throughout the day can reduce required dosage and toxicity while enhancing therapeutic outcomes. Therefore, during chemotherapy infusion, strictly follow the infusion schedule and rate prescribed by healthcare providers. Do not arbitrarily adjust the infusion rate. |
|  | 2.2 Postoperative Rehabilitation and Functional Recovery Support | 2.2.1 Lymphatic Drainage Exercise Guidance:  ① Incorporate self-administered lymphatic drainage exercises into routine upper limb functional training to help prevent and alleviate lymphedema. Teach patients and their spousal caregivers the correct method for measuring upper limb circumference to ensure accurate monitoring of lymphedema changes. Through video tutorials/in-person instruction, guide breast cancer patients in mastering proper lymphatic drainage techniques, including massage pressure, direction, and sequence, to ensure the effectiveness and safety of self-administered lymphatic drainage. Lymphatic drainage exercises should be performed after wound healing, recommended 3 times daily for 10 minutes each session. |
|  |  | 2.2.2 Functional Exercises for the PICC Insertion Side:  ① Provide detailed guidance to patients on functional exercises for the limb on the PICC insertion side, including:  Fist Clenching Exercise: Perform fist clenching exercises daily using a wrist ball, 30 repetitions per session, to strengthen hand muscles.  Wrist Rotation Exercise: Perform 50 wrist rotations daily on each side to promote joint range of motion. Arm elevation exercises: Perform 3 sets daily, each lasting 10 minutes, with the arm elevated no higher than 90° to avoid overloading the catheter-insertion side.  ② Inform the patient and their spouse/caregiver that if any discomfort such as soreness, swelling, or pain occurs in the catheter-insertion side limb, they should immediately cease the exercise and promptly report it to the medical team to prevent further injury. |
|  |  | 2.2.3 Rehabilitation Exercise Follow-up and Evaluation:  ① Regularly monitor patients' rehabilitation exercise progress. Evaluate exercise effectiveness through functional assessments and subjective feedback, providing necessary adjustment recommendations: increasing or decreasing exercise intensity, modifying exercise methods, to ensure the sustained and effective implementation of rehabilitation plans. Continuously optimize rehabilitation exercise protocols based on feedback and evaluation outcomes to enhance overall rehabilitation outcomes. |
|  | 2.3 Management and Relief Strategies for Chronic Fatigue | 2.3.1 Fatigue Management Education:  ① Provide detailed explanations of the physiological and psychological causes of chronic fatigue to help patients and their spouses/caregivers understand the mechanisms and impacts of fatigue. Teach methods for balancing activities and rest, optimize nutritional intake, and introduce strategies for energy conservation and allocation to assist patients and their spouses/caregivers in effectively managing fatigue. |
|  |  | 2.3.2 Mild Exercise Program Design:  ① Rehabilitation physicians from the research team design specific exercise plans based on patients' physical condition and needs: 3-5 sessions per week of 30-minute moderate-intensity walking, which may be divided into segments if necessary; 2–3 sessions per week of 45-minute yoga practice, focusing on gentle stretching and breathing exercises; 1–2 sessions per week of 60-minute Tai Chi practice, emphasizing slow and coordinated movements. Additionally, incorporate 10–15 minutes of full-body stretching daily, combined with deep breathing to promote relaxation.  ② Exercise plans should be personalized based on individual fitness levels and fatigue tolerance, gradually increasing intensity to avoid overexertion. Monitor effectiveness through diary entries and self-assessment, adjusting the plan as needed. Group guidance and spousal support should be integrated to ensure proper technique and consistency, helping couples effectively manage fatigue and enhance overall quality of life. |
| Course 3:  Restoring Psychological Balance | 3.1 Recognition and Coping Strategies for Anxiety and Depression | 3.1.1 Recognizing Anxiety and Depression:  ① Instruct patients and their spousal caregivers on how to identify early signs of anxiety and depression. Through guidance on specific behavioral changes, emotional shifts, and physical responses, help them recognize manifestations of anxiety or depression in themselves or each other. |
|  |  | 3.1.2 Alleviating Anxiety and Depression:  ① Teach BC couples breathing meditation and sound meditation to alleviate anxiety and depression. Breathing Meditation: Guide patients and their spouse caregivers to sit quietly, maintain awareness, follow the breathing meditation music and instructions, relax thoughts and breathing, feel the flow of breath, visualize bodily changes, and objectively observe events and thoughts arising in the mind; Sound Meditation: Instruct patients and their spouses/caregivers to close their eyes, adopt a comfortable position, and focus on listening to soothing music. Different categories of Five Elements music can be selected for various time periods. The most recommended tracks are: for heart nourishment, listen to “Purple Bamboo Tune” from 9:00 PM to 11:00 PM; for liver nourishment, listen to “Eighteen Lamentations of the Huqin” from 7:00 PM to 11:00 PM; For spleen nourishment, listen to “Ambush on Ten Sides” during or one hour after meals. For lung nourishment, listen to “Spring Snow” between 3:00 PM and 7:00 PM. For kidney nourishment, listen to “Three Variations on the Plum Blossom” between 7:00 AM and 11:00 AM. Times and frequency may be adjusted based on the couple's specific circumstances. |
|  | 3.2 Coping Strategies for Future Uncertainty | 3.2.1 Strengthen Disease Knowledge:  ① Enhance health education on the progression of breast cancer, the latest treatment methods, and prognosis, particularly information regarding fertility options and genetic risks, to help patients and their spouses fully understand the potential course of the disease. |
|  |  | 3.2.2 Patient Experience Sharing:  ① Organize patient exchange meetings to share cancer-fighting experiences, inviting recovered patients or long-term survivors to discuss their treatment journeys, coping strategies, and psychological adjustment methods; encourage patients and their spouses/caregivers to actively share insights, ask questions, and seek support, fostering ongoing interaction and communication among peers to strengthen the confidence and hope of breast cancer couples. |
|  | 3.3 Improved Sleep Quality and Emotional Regulation | 3.3.1 Sleep Quality Improvement:  ① Guide patients to create an optimal sleep environment (e.g., bedroom temperature, lighting, noise control) and establish healthy sleep habits. Follow prescribed Chinese herbal foot soaks to promote sleep. Use a well-insulated wooden basin with water level exceeding the ankle joint by 20cm. Maintain water temperature at 38°C for 30 minutes per session, once nightly. Ear acupuncture points for sleep support: Stimulate the subcortical, Shenmen, Heart, Sympathetic, and Pre-hypophyseal points on the ear. Apply pressure 4 times daily (at 08:00, 12:00, 18:00, and before bedtime), pressing each point 100 times (see intervention manual for point locations).  ② Recommended use of sleep monitoring devices or applications. Elderly patients may utilize a “Sleep Log Sheet” to record daily sleep patterns, specific bedtime and wake-up times, and sleep quality, aiding in adjusting and optimizing sleep improvement strategies. |
|  |  | 3.3.2 Emotional Management Training:  ① Teach patients and spouses how to recognize and manage emotional fluctuations, using deep breathing exercises and mindfulness practices to alleviate stress and anxiety, thereby enhancing emotional regulation skills; provide effective methods for expressing emotions to prevent emotional suppression and accumulation.  ② Continuously assess the emotional state of patients and their spouse caregivers through questionnaires, emotional journals, and regular interviews; invite family members to participate in emotional management training to strengthen the family's emotional support system and promote understanding and cooperation within the household. |
| Course 4:  Practical Support Enhancement | 4.1 Financial Aid Information and Resource Support | 4.1.1 Medical Resource Organization and Sharing:  ① Organize and systematically share BC-related medical resources, policy information, financial assistance programs, and introductions to clinical trials for relevant medications, examinations, tests, and treatments. This helps patients and their spousal caregivers gain a comprehensive understanding of available resources. |
|  |  | 4.1.2 Enhancing Shared Decision-Making Among Healthcare Providers, Staff, and Patients:  ① Strengthen healthcare professionals' understanding of national medical reimbursement policies, including drug costs and reimbursement rates for breast cancer treatments, reimbursement rates and procedures for out-of-area medical care, and transfer-related medical expenses, while standardizing reimbursement processes.  ② Promote effective communication between physicians, nurses, and patients to ensure treatment and care decisions fully consider patients' financial circumstances and personal preferences. Train healthcare providers in appropriate communication techniques to proactively explain the costs and financial implications of different treatment options, empowering patients to make informed decisions based on comprehensive information. Have physicians from the research team discuss treatment choices with BC couples, balancing medical efficacy against financial burden to ensure treatment plans meet both medical standards and the family's economic capacity. This approach enhances satisfaction and treatment adherence among patients and their spouse caregivers. |
|  | 4.2 Caregiver Health Management and Stress Coping | 4.2.1 Self-Health Monitoring for Caregivers:  ① Provide personalized physical health check recommendations for spousal caregivers to help them promptly identify and address potential health issues. Encourage spousal caregivers to regularly monitor key physical indicators such as blood pressure, blood sugar, cholesterol, and weight based on individual circumstances .  ② Guide caregivers to recognize early health warning signs in daily life, such as abnormal fatigue, weight fluctuations, or mood changes, ensuring timely detection of potential physical or mental health issues. |
|  |  | 4.2.2 Caregiver Stress Relief Training:  ① Teach spousal caregivers progressive muscle relaxation (PMR) techniques to effectively alleviate stress and anxiety arising from patient care. PMR: Preparation: Lie flat with legs apart, arms at sides, adopting the most comfortable position. Training: Guide caregivers to take deep breaths, tense hand muscles for 10–15 seconds, then relax for 10–15 seconds, noting the difference in sensation between tension and relaxation. Relaxation Training: Instruct caregivers to self-check their baseline pulse. Advise them to clear distracting thoughts and focus their mind before beginning formal relaxation training. Follow the PMR tutorial published by the Chinese Medical Association Audio-Visual Publishing House, starting with hand relaxation. Progress sequentially through the forearm, upper arm, shoulder, neck, chest, and other muscle groups. Practice each area twice, with each session lasting 25-30 minutes. Post-relaxation: Instruct caregivers to self-check their post-relaxation pulse. To ensure PMR effectiveness and facilitate timely guidance from researchers, encourage patients to actively express their feelings about the training process after relaxation.  ② Encourage spouse caregivers to participate in physical activities and social engagements, ensuring they prioritize their own physical and mental well-being while caring for others. Encourage caregivers to connect with fellow caregivers, share their feelings and experiences, and reduce feelings of isolation. |
| Course 5:  Optimizing Marital Relationships | 5.1 Communication Skills and Emotional Support Between Spouses | 5.1.1 Authentic Expression:  ① Introduce the importance of objectively describing disease-related experiences or observed behaviors of the partner to the BC couple, without arbitrary criticism, commentary, blame, or comparison. Guide the BC couple to express their thoughts as truthfully as possible based on observed facts and to sincerely articulate their feelings; guide the BC couple to express their needs and requests as authentically and clearly as possible regarding their thoughts and feelings.  ② Classroom Exercise: Couples select a disease-related topic of mutual interest to practice the above skills, with each partner speaking for 10-15 minutes.  Exercise 1: *"Lately, my physical discomfort has caused significant emotional fluctuations. When you didn't offer enough care during my low moments, I felt lonely and neglected. I hope we can find ways to manage stress together. Would you be willing to discuss this with me?"*  Exercise 2: *“During treatment, I sometimes feel exhausted and powerless. When you decide to do something without discussing it first, I feel disappointed because I hope we can share these responsibilities together. Can you understand how I feel?”* |
|  |  | 5.1.2 Active Listening:  ① Guide the BC couple to express their views on what makes a “good listener,” and use their responses to introduce communication skills related to listening, including quiet, attentive, and empathetic listening. Guide the BC couple to identify each other's needs and provide appropriate practical and emotional support based on past experiences and advice from others.  ② Classroom Exercise: BC couples select a disease-related topic of personal interest for self-disclosure. While one partner speaks, the other listens quietly and attentively, offering verbal, nonverbal, or eye contact responses as needed. Encourage deep, open expression while ensuring the speaker feels understood, valued, and cared for. Each session lasts 10-15 minutes.  Exercise 1: *“When you talk about feeling uncertain about future treatments, I sense your anxiety and worry. How would you like me to support you so you feel better?”*  Exercise 2: *“Hearing you say you've been struggling to sleep lately and feeling overwhelmed, I understand this is tough for you. Is there anything you need me to do, or something we can do together to improve this situation?”* |
|  | 5.2 Spousal Role Transition and Adaptation Support | 5.2.1 Role Perception Counseling:  ① Guide BC couples to recognize that illness is merely a transitional phase in their lives, helping them break free from the confines of the “patient and caregiver” roles. Encourage them to confront illness and life together primarily as “husband and wife,” redefining their respective roles within the family and relationship to foster equality and cooperation.  ② Homework: Conduct a “role-swapping exercise” where spouses take turns assuming each other's roles, simulating daily interactions to deepen mutual understanding and empathy; or organize a “role-redefining discussion” where couples collaboratively explore how to adjust and optimize their respective roles during illness, ensuring support for each other while maintaining individual identities. |
|  |  | 5.2.2 Harnessing the Power of Relationships:  ① Guide BC couples to recall happy moments shared in their lives, helping them revisit past joys. By revisiting and rebuilding shared positive memories, strengthen the emotional bond and stability of their relationship.  ② Homework: “Write a thank-you letter to your partner” or “Express your gratitude face-to-face.” |
| Course 6:  Exploring Inner Growth | 6.1 Exploring Life's Meaning and Rebuilding Values | 6.1.1 Meaning Exploration and Expression:  ① Encourage patients and their spousal caregivers to deeply reflect on and express their inner feelings through various methods such as journaling and painting. This helps them discover new life meanings and redefine personal value while facing illness.  ② Have both partners take turns sharing their understanding and feelings about life's meaning to foster mutual understanding and support.  Homework: Couples should select a significant life event for them, share how this event shaped their perspective on life's meaning, and discuss lessons learned. For example, when discussing a family trip, they can recall joyful moments, challenges encountered, and how they collaborated to overcome them. Analyze how this trip strengthened their bond and positively impacted the family atmosphere. |
|  |  | 6.1.2 Life Goals and Value Realization:  ① Encourage couples to jointly explore how to balance work, family, and personal health, develop reasonable life plans, and help them identify and prioritize important matters while allocating time and energy appropriately. Simultaneously, encourage patients and spouse caregivers to cultivate shared hobbies and participate in activities they enjoy, such as travel or sports, to enhance quality of life.  ② Create a shared activity schedule where both partners take turns planning and selecting activities of mutual interest. This ensures each has opportunities to engage in activities the other enjoys, fostering personal and relational psychological growth.  Homework: Designate one day as “Interest Day.” Couples take turns choosing an activity, such as participating in a community event or going on an outdoor hike, to enjoy shared hobbies. After the activity, share photos, reflections, and experiences from the outing, documenting these cherished moments. |
|  | 6.2 Enhancing Psychological Resilience and Self-Efficacy | 6.2.1 Enhancing Psychological Resilience:  ① Guide BC couples to jointly review their shared experiences of coping with illness over the past six weeks, reflect on and summarize the skills learned (such as techniques for alleviating stress and negative emotions), discuss which strategies proved most effective, and share their feelings and growth in facing challenges. This helps patients and their caregivers further enhance their psychological resilience. |
|  |  | 6.2.2 Enhancing Self-Efficacy:  ① Through reflection and review, help patients and their spouse caregivers recognize their accomplishments during cancer treatment, strengthening confidence in their capabilities. Encourage them to celebrate small victories and share success stories to further boost their sense of self-efficacy.  ② After intervention completion, jointly assess with BC couples the progress made toward achieving individual and shared goals set at the outset, and develop plans for future continuity. |
